# Supplementary material
Source: publisher site journal article supplement (https://static.cambridge.org/content/id/urn:cambridge.org:id:article:S0899823X20000756/resource/name/S0899823X20000756supp002.docx)

**Appendix 4. Spectrum narrowing class modification and early discontinuation for broad-spectrum antibiotics.**


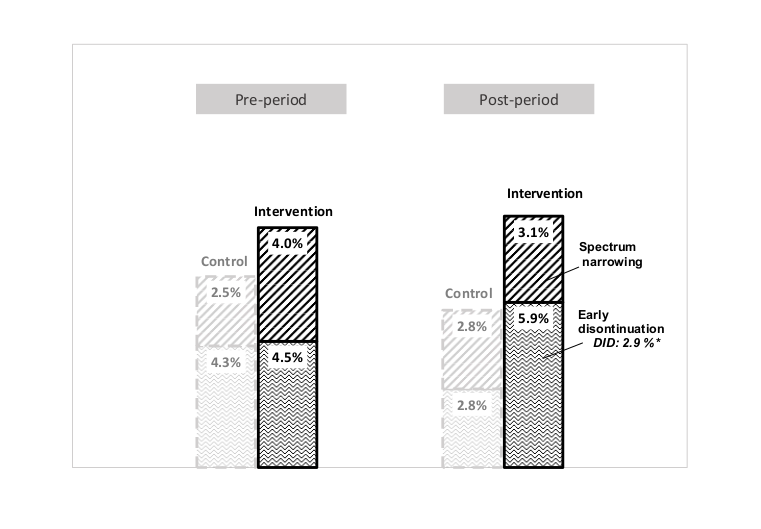

Supplement: Supplementary file 1 [file S0899823X20000756supp002.docx]
